# Supplementary material for: AQP1-Driven Migration Is Independent of Other Known Adverse Factors but Requires a Hypoxic Undifferentiated Cell Profile in Neuroblastoma
Source: MDPI journal article supplement (doi:10.3390/children8010048), 2021-01-15

Supplementary material Figure 2B

Kelly cells  
Hypoxia  
High density

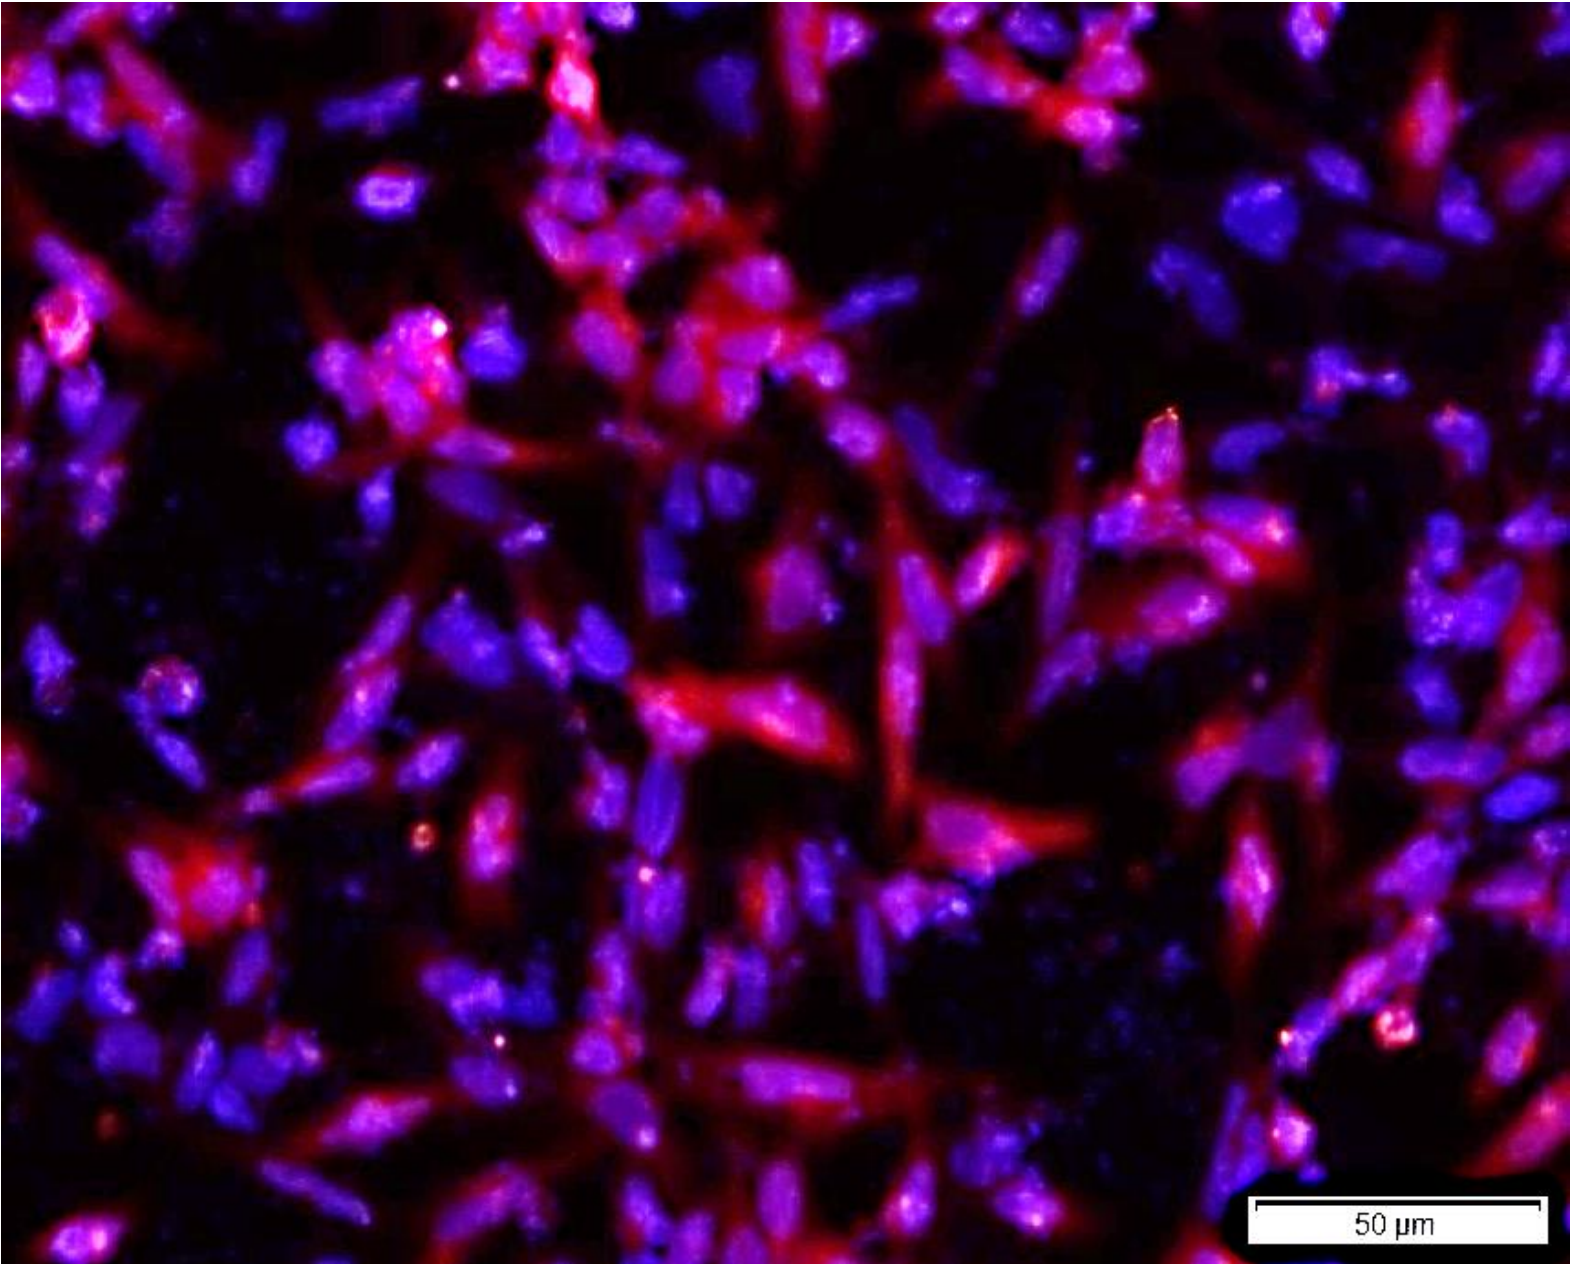

AQP1 DAPI

Kelly cells  
Hypoxia  
low density

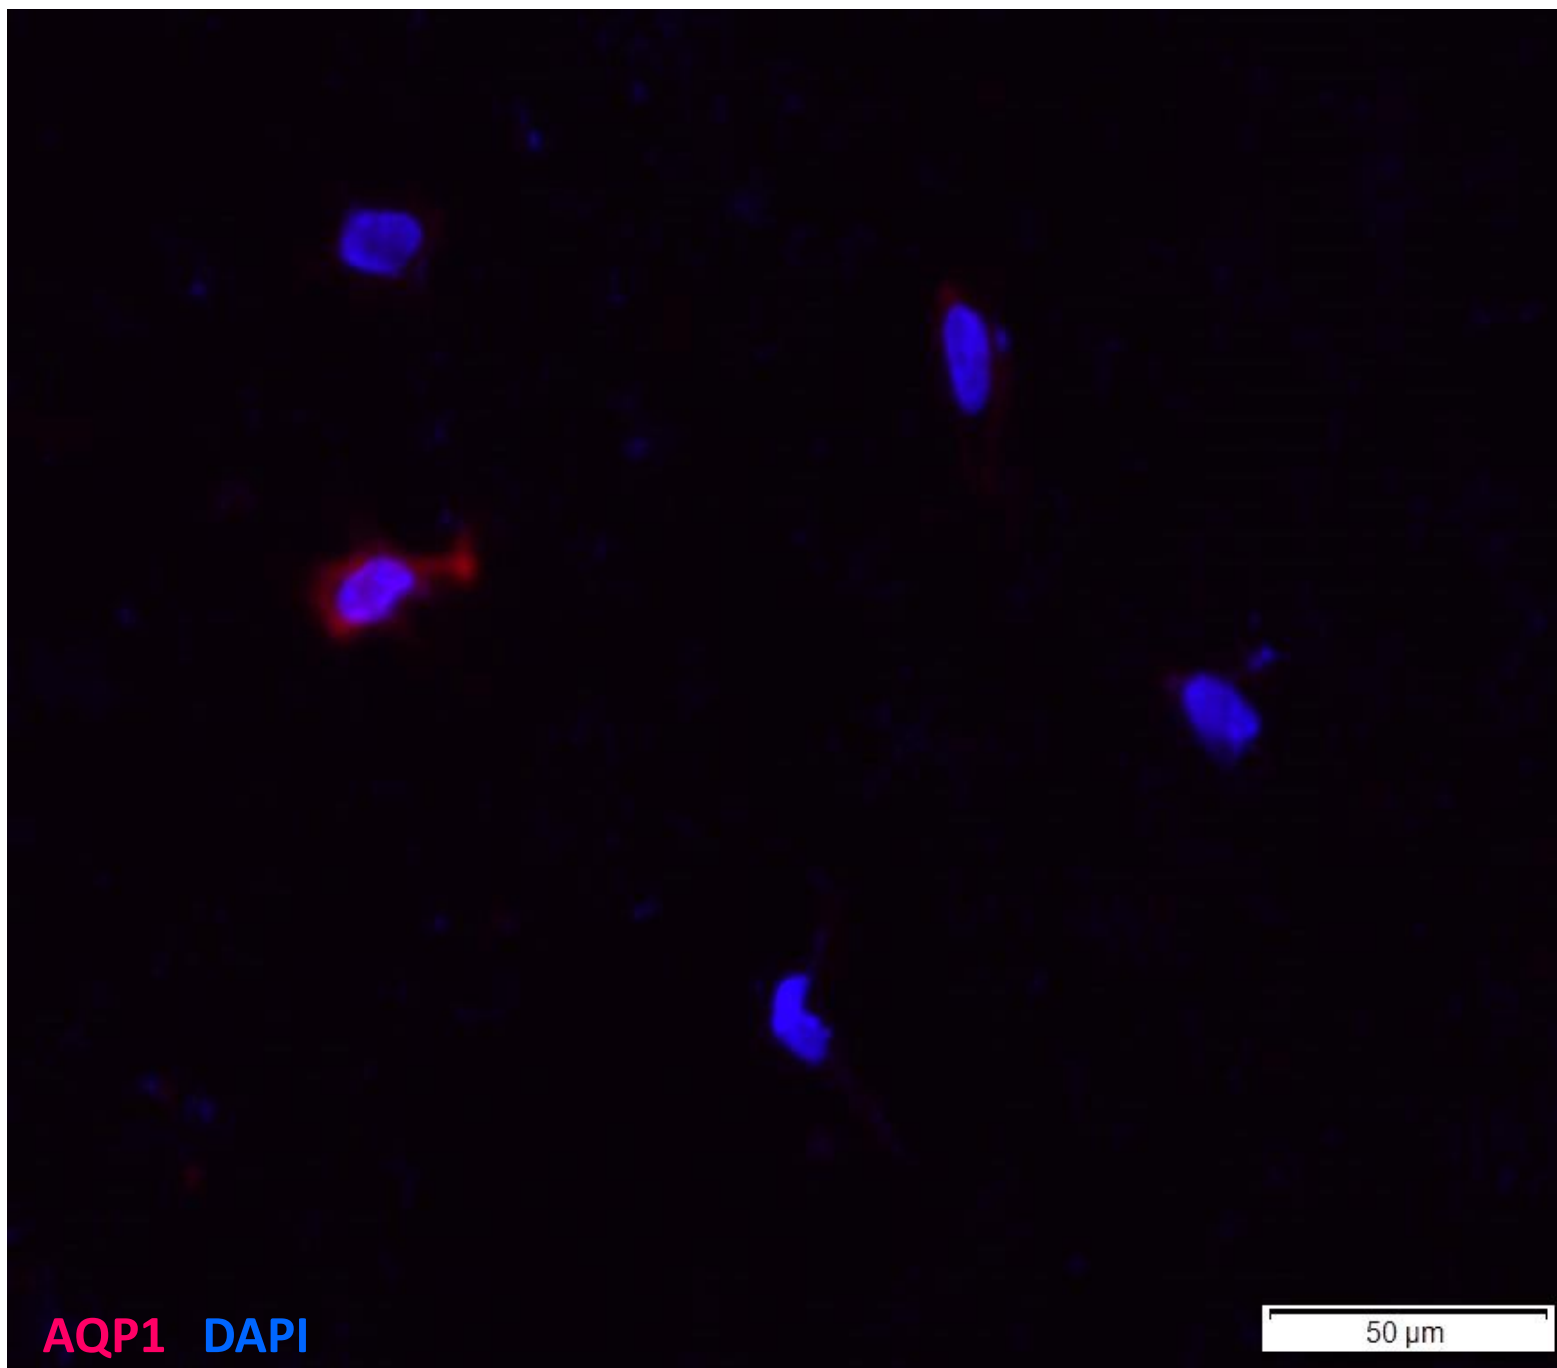

Supplement: s1 [file s1]
